# Supplementary material for: Chromatin landscapes and genetic risk for juvenile idiopathic arthritis
Source: Arthritis Res Ther. 2017 Mar 14;19:57. doi: 10.1186/s13075-017-1260-x (PMC5348874; doi:10.1186/s13075-017-1260-x)
Supplement: Additional file 5: Table S2. — Enriched biological functions of genes within JIA-associated LD blocks. (XLS 28 kb) [file 13075_2017_1260_MOESM5_ESM.xls]

## Sheet: S.Table 2.csv
Additional file 5: Table S2. Enriched biological functions
PANTHER Pathways	Homo sapiens - REFLIST (20972)	Client Text Box Input (235)	Client Text Box Input (expected)	Client Text Box Input (over/under)	Client Text Box Input (fold Enrichment)	Client Text Box Input (P-value)
Interleukin signaling pathway (P00036)	98	17	1.1	+	15.48	4.6e-13
Inflammation mediated by chemokine and cytokine signaling pathway (P00031)	261	15	2.92	+	5.13	5.75e-05
PANTHER GO-Slim Biological Process	Homo sapiens - REFLIST (20972)	Client Text Box Input (235)	Client Text Box Input (expected)	Client Text Box Input (over/under)	Client Text Box Input (fold Enrichment)	Client Text Box Input (P-value)
antigen processing and presentation of peptide or polysaccharide antigen via MHC class II (GO:0002504)	40	7	0.45	+	15.62	0.000109
antigen processing and presentation (GO:0019882)	61	7	0.68	+	10.24	0.00171
hemopoiesis (GO:0030097)	95	8	1.06	+	7.52	0.00352
cellular defense response (GO:0006968)	208	14	2.33	+	6.01	3.36e-05
sulfur compound metabolic process (GO:0006790)	127	8	1.42	+	5.62	0.0264
immune system process (GO:0002376)	1269	39	14.22	+	2.74	2.71e-06
response to stimulus (GO:0050896)	2550	50	28.57	+	1.75	0.0136
